# Supplementary material for: 3D graphene foam/ZnO nanorods array mixed-dimensional heterostructure for photoelectrochemical biosensing
Source: Royal Society of Chemistry journal article supplement (doi:10.1039/c7qi00669a), 2017-12-01
Supplement: c7qi00669a1.pdf [file c7qi00669a1.pdf]

# **3D graphene foam/ZnO nanorods array mixed-dimensional heterostructure for photoelectrochemical biosensing**

Zhuo Kang<sup>a</sup>, Yong Li<sup>a</sup>, Shiyao Cao<sup>a</sup>, Zihan Zhang<sup>a</sup>, Huijing Guo<sup>a</sup>, Pingwei Wu<sup>a</sup>, Lixin Zhou<sup>a</sup>, Suicai Zhang<sup>a</sup>, Jing Wu<sup>a</sup>, Xiaomei Zhang<sup>b</sup>, Yue Zhang<sup>a,c,\*</sup>

*<sup>a</sup>State Key Laboratory for Advanced Metals and Materials, School of Materials Science and Engineering, University of Science and Technology Beijing, Beijing 100083, China*

*<sup>b</sup>Department of Mechanical Engineering, Tokyo Institute of Technology, Tokyo, Japan*

*<sup>c</sup>Key Laboratory of New Energy Materials and Technologies, University of Science and Technology Beijing, Beijing 100083, China*

*\*Corresponding author: The Beijing Municipal Key Laboratory of New Energy Materials and Technologies, University of Science and Technology Beijing, Beijing, 100083, China.*

E-mail: yuezhang@ustb.edu.cn (Y. Zhang)

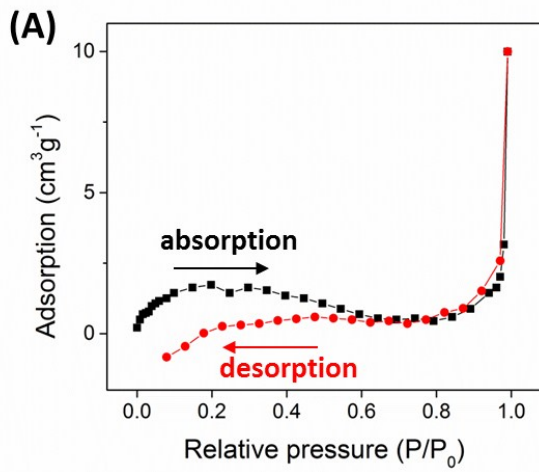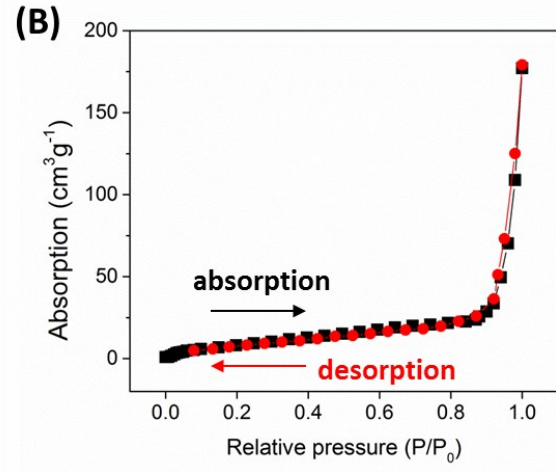

**Figure S1.** Brunauer-Emmett-Teller (BET) nitrogen adsorption/desorption characteristics of pristine 3DGF (A) and 3DGF/ZnO (B), respectively. The specific surface area of 3DGF is  $5.7 \text{ m}^2\text{g}^{-1}$ , while it changed to  $39.2 \text{ m}^2\text{g}^{-1}$  after synthesis of ZnO NRs array. The results demonstrated the significant surface area increase for 3DGF/ZnO compared with pristine 3DGF.
